# Supplementary material for: Effect of Baking Time and Temperature on Nutrients and Phenolic Compounds Content of Fresh Sprouts Breadlike Product
Source: MDPI journal article supplement (doi:10.3390/foods9101447), 2020-10-13
Supplement: s1 [file s1]

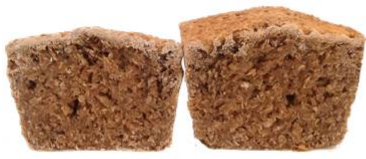

GR100

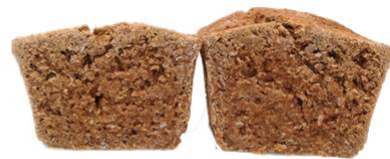

GR150

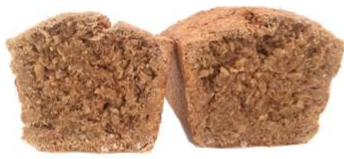

WM100

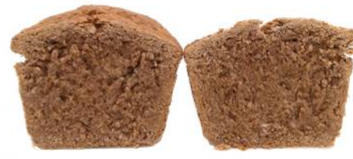

WM150

**Figure 1s.** Bread-like products

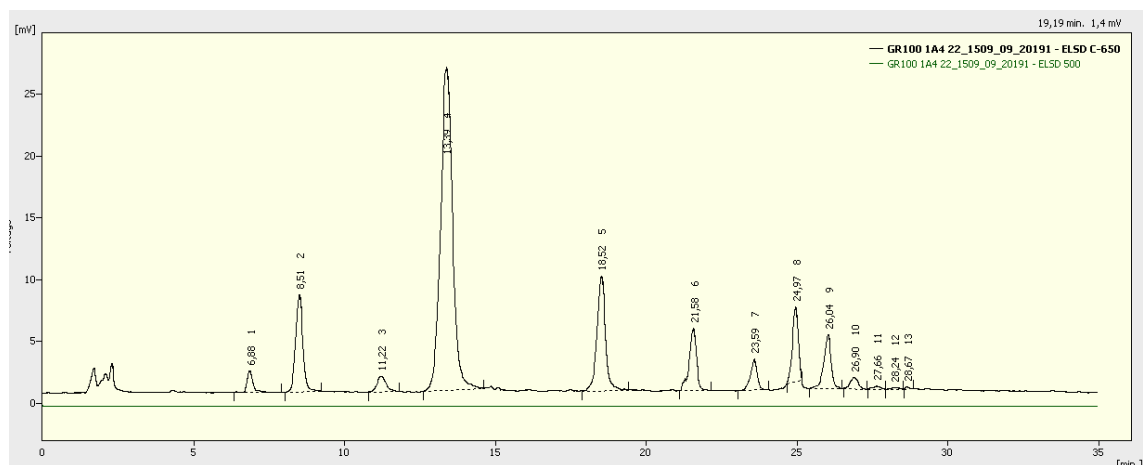

**Figure 2s.** Sugar profile chromatogram of the GR100 sample.
